# Supplementary material for: Expression of Saccharomyces cerevisiae RER2 Gene Encoding Cis-Prenyltransferase in Trichoderma atroviride Increases the Activity of Secretory Hydrolases and Enhances Antimicrobial Features
Source: MDPI journal article supplement (doi:10.3390/jof9010038), 2022-12-26
Supplement: s1 [file s1]

**Table S1.** Primers used in this studies

| Primer name | 5'- sequence -3'           | Amplicon size<br>bp | Purpose                                                                 |
|-------------|----------------------------|---------------------|-------------------------------------------------------------------------|
| Rer2F_c     | CCTATACGGATGGCATGG<br>ATT  | 105                 | Primers homologous to the <i>RER2</i><br>gene from <i>S. cerevisiae</i> |
| Rer2R_c     | CCCATTGGTTTCCTCGTC<br>ATA  |                     |                                                                         |
| Rer2TaF     | TCCCATACACATCGAGAG<br>CAG  | 198                 | Primers homologous to the <i>rer2</i><br>gene from <i>T. atroviride</i> |
| Rer2TaR     | TTGCCCTCATACTCGCCA<br>TC   |                     |                                                                         |
| Nus1_F      | CCGCGAGATATTTCCCAA<br>GA   | 97                  | Primers homologous to the <i>nus1</i><br>gene from <i>T. atroviride</i> |
| Nus1_R      | GCTCGACGTAAGGAGTG<br>AATAG |                     |                                                                         |
| FActTa      | AACCGTGAGAAGATGAC<br>CCAG  | 198                 | Primers homologous to the <i>act1</i><br>gene from <i>T. atroviride</i> |
| RActTa      | CCATGTCCACACGAGCA<br>ATG   |                     |                                                                         |

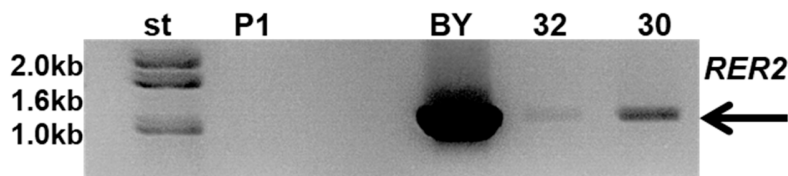

**Figure S1.** The presence of the yeast *RER2* gene in the genome of the transformants analyzed by PCR  
As a positive and negative control the PCR reactions were performed on the templates of DNA from *S. cerevisiae* (BY) and untransformed *T. atroviride* (P1), respectively.  
32 and 30 represent PCR products obtained on the template of DNA from RER32/11 and RER30/11 transformants, respectively.
